# Supplementary material for: A Green Approach to Obtaining Glycerol Carbonate by Urea Glycerolysis Using Carbon-Supported Metal Oxide Catalysts
Source: MDPI journal article supplement (doi:10.3390/molecules28186534), 2023-09-09
Supplement: s1 [file s1]

# SUPPLEMENTARY MATERIAL

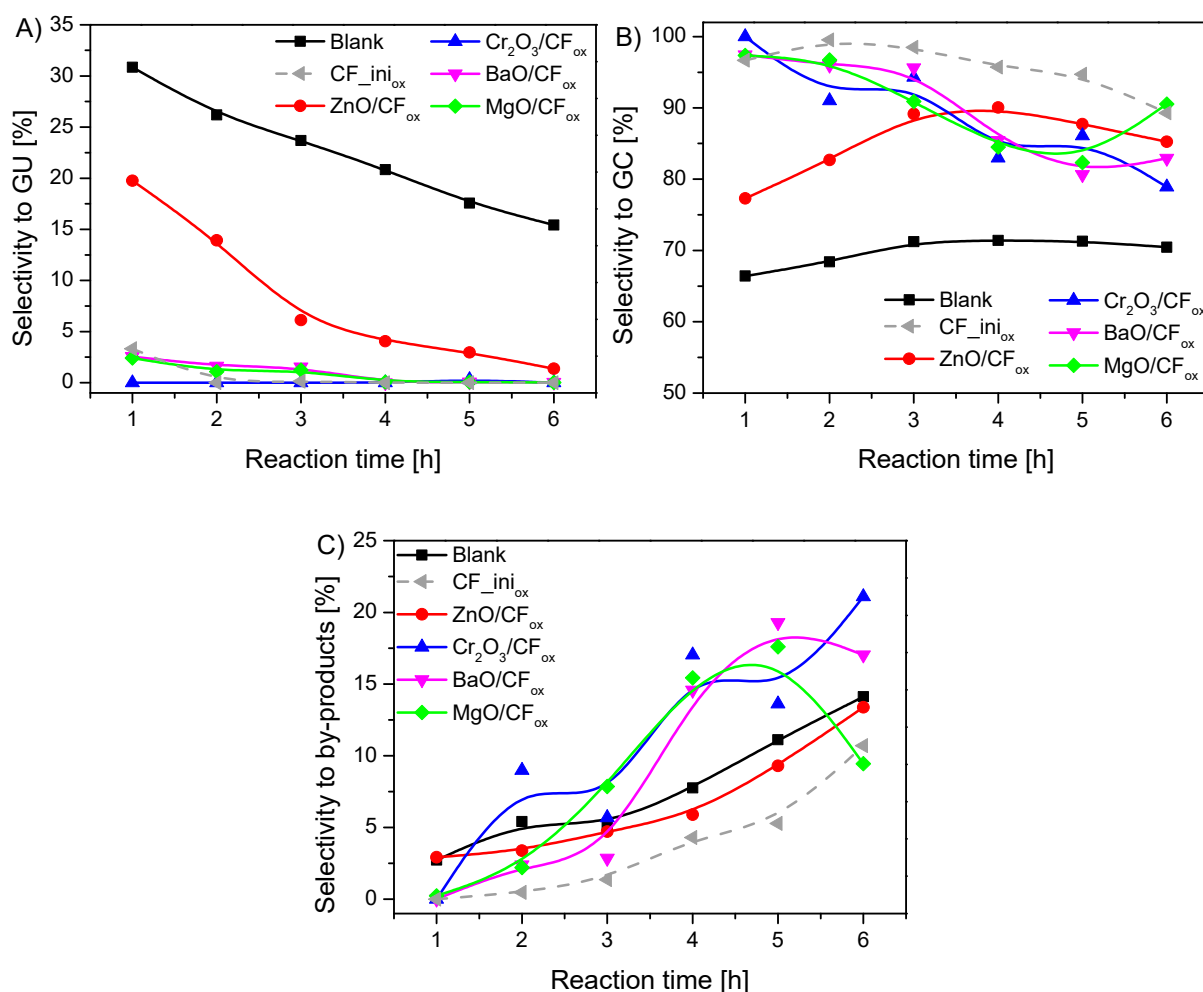

**Figure S1.** The results of selectivity to different products obtained in the blank test and in the reaction over  $\text{CF}_{\text{ini}_{\text{ox}}}$  sample and  $\text{CF}_{\text{ox}}$ -supported catalysts (GU – glycerol urethane; GC – glycerol carbonate)

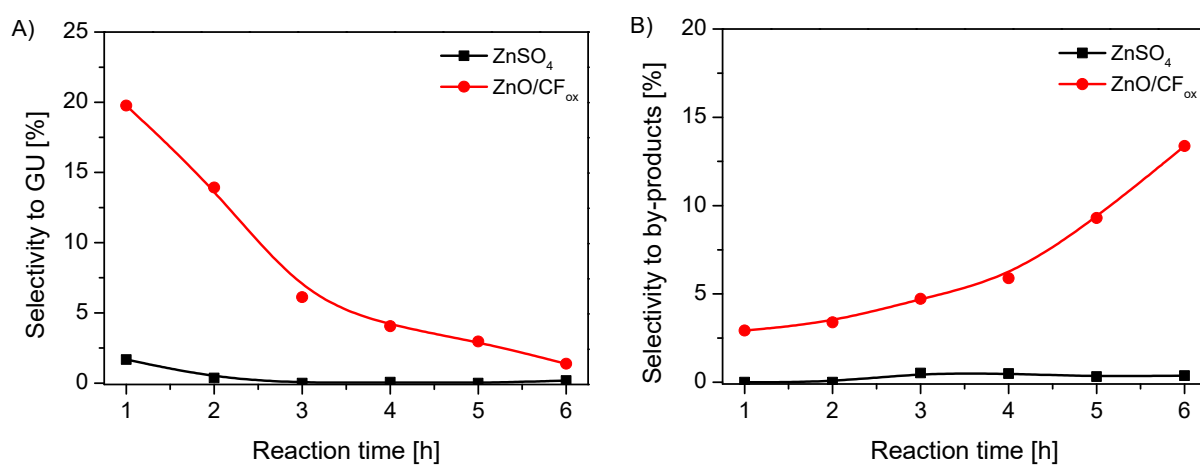

**Figure S2.** The results of selectivity to A) glycerol urethane (GU) and B) by-products obtained for the homogeneous and  $\text{CF}_{\text{ox}}$ -supported ZnO catalysts vs. time

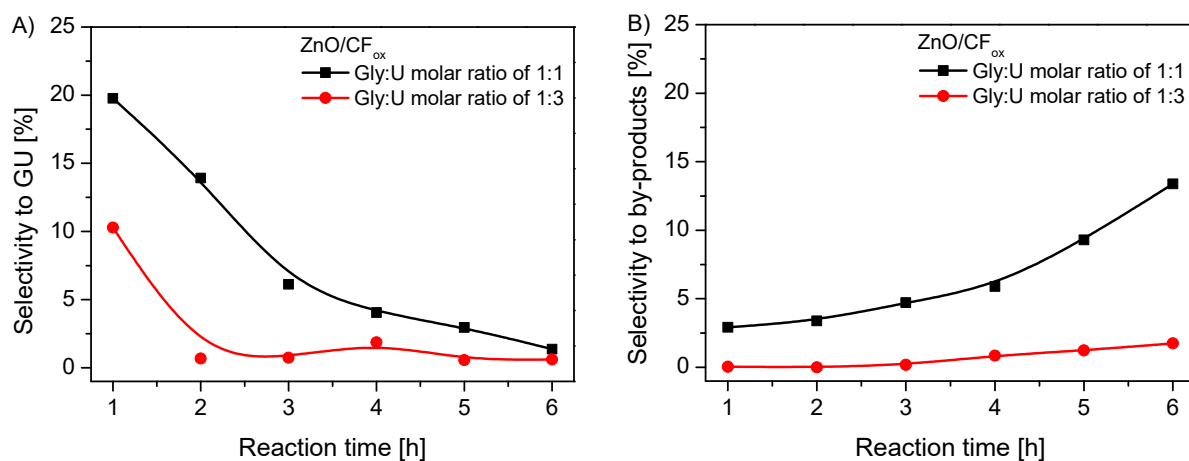

**Figure S3.** The results of selectivity to A) glycerol urethane (GU) and B) by-products obtained over the CF<sub>ox</sub>-supported ZnO catalyst using different glycerol to urea (Gly:U) molar ratios

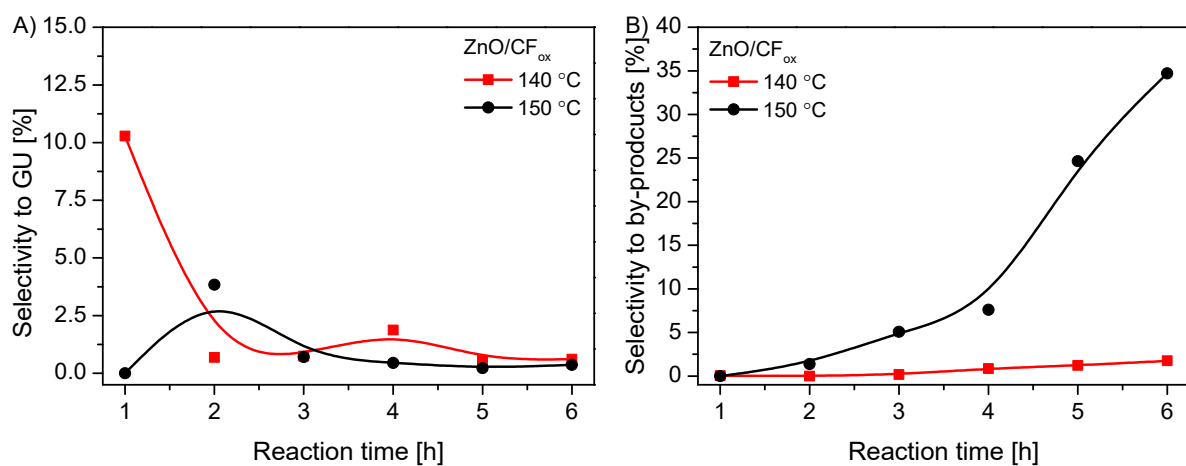

**Figure S4.** The results of selectivity to A) glycerol urethane (GU) and B) by-products obtained over the CF<sub>ox</sub>-supported ZnO catalyst at different temperatures

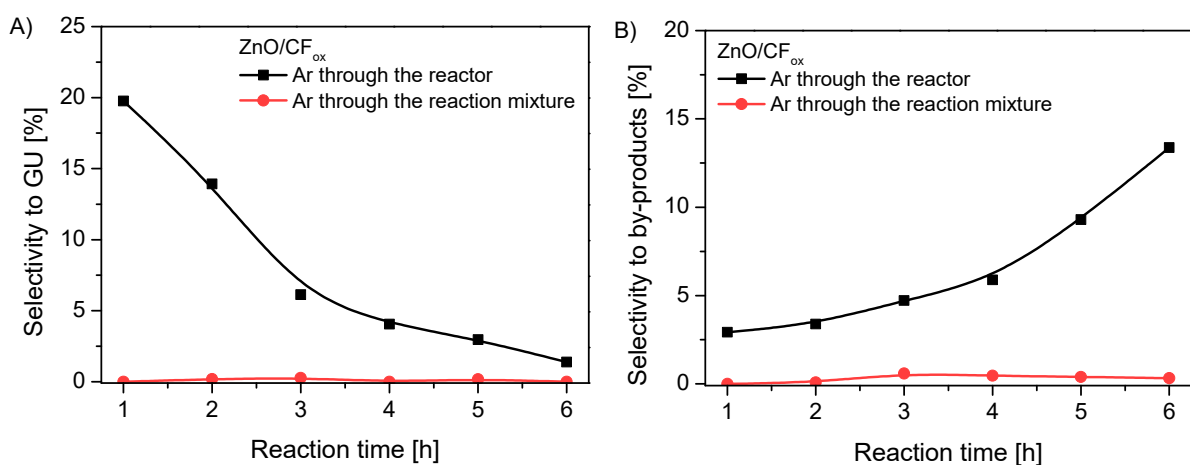

**Figure S5.** The results of selectivity to A) glycerol urethane (GU) and B) by-products obtained over the CF<sub>ox</sub>-supported ZnO catalyst using different reaction set-ups
